# Supplementary material for: Androgen receptor splice variant-7 expression emerges with castration resistance in prostate cancer
Source: PubMed Central journal article supplement (PMC6307949; doi:10.1172/jci122819), 2018-11-26
Supplement: jci-129-122819-s117.pdf [file jci-129-122819-s117.pdf]

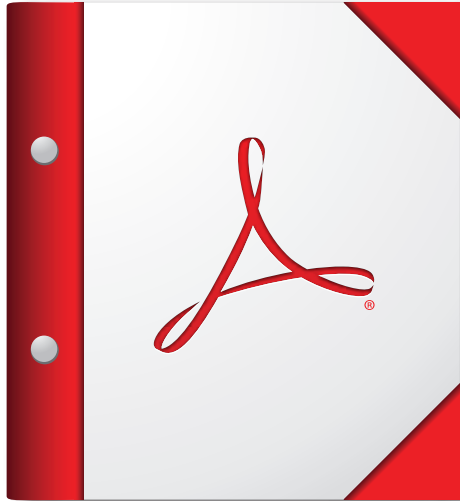

**For the best experience, open this PDF portfolio in  
Acrobat X or Adobe Reader X, or later.**

[Get Adobe Reader Now!](#)
